# Supplementary material for: Precision Feeding in Ecological Pig-Raising Systems with Maize Silage
Source: MDPI journal article supplement (doi:10.3390/ani12111446), 2022-06-03
Supplement: s1 [file s1]

## Supplementary material A

The units of the following results were the inputs of per live pig.

**Table S1. Emergy inputs and outputs details of ecological livestock production systems**

| Percentage of the maize silage added |      |      |          | 0%       |          | 10%      |          | 40%      |          | 60%      |          | 80%      |          |
|--------------------------------------|------|------|----------|----------|----------|----------|----------|----------|----------|----------|----------|----------|----------|
| Item                                 | Unit | RNFa | UEVb     | Raw data | Emergy   |
| Raising period                       |      |      |          | 60 days  |          |          |          |          |          |          |          |          |          |
| Natural environmental inputs         |      |      |          |          |          |          |          |          |          |          |          |          |          |
| sun c                                | J    | 1.00 | 1.00E+00 | 3.25E+09 | 3.25E+09 | 2.60E+09 | 2.60E+09 | 3.25E+09 | 3.25E+09 | 2.59E+09 | 2.59E+09 | 2.59E+09 | 2.59E+09 |
| wind c                               | J    | 1.00 | 1.86E+03 | 9.00E+05 | 1.67E+09 | 7.14E+05 | 1.33E+09 | 8.94E+05 | 1.66E+09 | 7.20E+05 | 1.34E+09 | 7.14E+05 | 1.33E+09 |
| Rain c                               | J    | 1.00 | 2.35E+04 | 1.82E+06 | 4.27E+10 | 1.45E+06 | 3.41E+10 | 1.82E+06 | 4.27E+10 | 1.45E+06 | 3.41E+10 | 1.45E+06 | 3.41E+10 |
| Ground water                         | J    | 0.00 | 1.86E+05 | 1.60E+06 | 2.97E+11 | 1.91E+06 | 3.55E+11 | 1.60E+06 | 2.96E+11 | 1.92E+06 | 3.56E+11 | 1.91E+06 | 3.55E+11 |
| Local materials                      |      |      |          |          |          |          |          |          |          |          |          |          |          |
| Silage maize(dry weight)             | kg   | 0.24 | 1.65E+11 | 0.00E+00 | 0.00E+00 | 1.58E+01 | 2.61E+12 | 5.24E+01 | 8.64E+12 | 6.98E+01 | 1.15E+13 | 1.01E+02 | 1.67E+13 |
| Maize                                | kg   | 0.24 | 5.87E+11 | 1.07E+02 | 6.26E+13 | 1.11E+02 | 6.49E+13 | 4.58E+01 | 2.69E+13 | 2.33E+01 | 1.37E+13 | 0.00E+00 | 0.00E+00 |
| Soybean meal                         | kg   | 0.33 | 1.42E+12 | 2.13E+01 | 3.04E+13 | 2.37E+01 | 3.37E+13 | 1.96E+01 | 2.80E+13 | 1.74E+01 | 2.48E+13 | 1.90E+01 | 2.70E+13 |
| Wheat bran                           | kg   | 0.41 | 8.32E+11 | 1.42E+01 | 1.18E+13 | 7.90E+00 | 6.57E+12 | 1.31E+01 | 1.09E+13 | 5.81E+00 | 4.84E+12 | 6.33E+00 | 5.27E+12 |
| Purchased materials or services      |      |      |          |          |          |          |          |          |          |          |          |          |          |
| Piglet                               | Kg   | 0.21 | 9.02E+12 | 4.00E+01 | 3.61E+14 |
| Disinfectants                        | g    | 0.00 | 1.27E+09 | 2.78E+01 | 3.54E+10 |
| Vaccine                              | g    | 0.00 | 1.89E+10 | 1.05E+00 | 1.98E+10 | 9.84E-01 | 1.86E+10 | 3.58E-01 | 6.75E+09 | 9.84E-01 | 1.86E+10 | 9.84E-01 | 1.86E+10 |
| Micro-biological additives           | ¥    | 0.20 | 3.11E+11 | 1.25E+01 | 3.88E+12 |
| Electricity                          | J    | 0.09 | 2.17E+05 | 1.39E+06 | 3.01E+11 |
| Steel                                | g    | 0.00 | 3.52E+09 | 7.20E+02 | 2.54E+12 |
| Concrete                             | g    | 0.00 | 4.42E+08 | 5.13E+03 | 2.27E+12 |
| Glass                                | g    | 0.00 | 2.90E+07 | 2.63E+01 | 7.63E+08 |
| Building                             | ¥    | 0.05 | 3.11E+11 | 1.25E+00 | 3.89E+11 |

|                                 |             |      |          |          |          |          |          |          |          |          |          |          |          |
|---------------------------------|-------------|------|----------|----------|----------|----------|----------|----------|----------|----------|----------|----------|----------|
| Facilities                      | ¥           | 0.05 | 3.11E+11 | 6.24E+00 | 1.94E+12 |
| Medicine                        | ¥           | 0.05 | 3.11E+11 | 3.50E+01 | 1.09E+13 | 3.44E+01 | 1.07E+13 | 1.07E+01 | 3.34E+12 | 1.48E+01 | 4.59E+12 | 1.48E+01 | 4.59E+12 |
| Labor                           | J           | 0.60 | 5.73E+06 | 1.75E+06 | 1.00E+13 | 1.77E+06 | 1.01E+13 | 1.75E+06 | 1.00E+13 | 1.77E+06 | 1.01E+13 | 1.77E+06 | 1.01E+13 |
| Outputs                         | body weight | kg   |          | 71.77958 |          | 72.58556 |          | 71.27186 |          | 70.94967 |          | 71.85844 |          |
| Total emergy                    |             |      |          |          | 4.98E+14 |          | 5.01E+14 |          | 4.60E+14 |          | 4.42E+14 |          | 4.36E+14 |
| Raising period                  |             |      | 120 days |          |          |          |          |          |          |          |          |          |          |
| Natural environmental inputs    |             |      |          |          |          |          |          |          |          |          |          |          |          |
| sun c                           | J           | 1.00 | 1.00E+00 | 6.49E+09 | 6.49E+09 | 5.20E+09 | 5.20E+09 | 6.49E+09 | 6.49E+09 | 5.18E+09 | 5.18E+09 | 5.18E+09 | 5.18E+09 |
| wind c                          | J           | 1.00 | 1.86E+03 | 1.80E+06 | 3.34E+09 | 1.43E+06 | 2.65E+09 | 1.79E+06 | 3.32E+09 | 1.44E+06 | 2.67E+09 | 1.43E+06 | 2.65E+09 |
| Rain c                          | J           | 1.00 | 2.35E+04 | 3.64E+06 | 8.54E+10 | 2.90E+06 | 6.82E+10 | 3.64E+06 | 8.54E+10 | 2.90E+06 | 6.82E+10 | 2.90E+06 | 6.82E+10 |
| Ground water                    | J           | 0.00 | 1.86E+05 | 3.20E+06 | 5.95E+11 | 3.83E+06 | 7.11E+11 | 3.19E+06 | 5.92E+11 | 3.84E+06 | 7.13E+11 | 3.83E+06 | 7.11E+11 |
| Local materials                 |             |      |          |          |          |          |          |          |          |          |          |          |          |
| Silage maize(dry weight)        | kg          | 0.24 | 1.65E+11 | 0        | 0.00E+00 | 38.78611 | 6.40E+12 | 129.9134 | 2.14E+13 | 153.2924 | 2.53E+13 | 228.9723 | 3.78E+13 |
| Maize                           | kg          | 0.24 | 5.87E+11 | 232.0325 | 1.36E+14 | 271.5028 | 1.59E+14 | 113.6742 | 6.67E+13 | 51.09747 | 3.00E+13 | 0        | 0.00E+00 |
| Soybean meal                    | kg          | 0.33 | 1.42E+12 | 46.4065  | 6.61E+13 | 58.17916 | 8.29E+13 | 48.71753 | 6.94E+13 | 38.3231  | 5.46E+13 | 42.93231 | 6.11E+13 |
| Wheat bran                      | kg          | 0.41 | 8.32E+11 | 30.93767 | 2.57E+13 | 19.39305 | 1.61E+13 | 32.47835 | 2.70E+13 | 12.77437 | 1.06E+13 | 14.31077 | 1.19E+13 |
| Purchased materials or services |             |      |          |          |          |          |          |          |          |          |          |          |          |
| Piglet                          | Kg          | 0.21 | 9.02E+12 | 4.00E+01 | 3.61E+14 |
| Disinfectants                   | g           | 0.00 | 1.27E+09 | 2.78E+01 | 3.54E+10 |
| Vaccine                         | g           | 0.00 | 1.89E+10 | 2.10E+00 | 3.96E+10 | 1.97E+00 | 3.71E+10 | 7.15E-01 | 1.35E+10 | 1.97E+00 | 3.71E+10 | 1.97E+00 | 3.71E+10 |
| Micro-biological additives      | ¥           | 0.20 | 3.11E+11 | 2.50E+01 | 7.76E+12 |
| Electricity                     | J           | 0.09 | 2.17E+05 | 2.77E+06 | 6.03E+11 |
| Steel                           | g           | 0.00 | 3.52E+09 | 7.20E+02 | 2.54E+12 |
| Concrete                        | g           | 0.00 | 4.42E+08 | 5.13E+03 | 2.27E+12 |
| Glass                           | g           | 0.00 | 2.90E+07 | 2.63E+01 | 7.63E+08 |

|                                 |             |      |          |          |          |          |          |          |          |          |          |          |          |
|---------------------------------|-------------|------|----------|----------|----------|----------|----------|----------|----------|----------|----------|----------|----------|
| Building                        | ¥           | 0.05 | 3.11E+11 | 1.25E+00 | 3.89E+11 |
| Facilities                      | ¥           | 0.05 | 3.11E+11 | 6.24E+00 | 1.94E+12 |
| Medicine                        | ¥           | 0.05 | 3.11E+11 | 7.00E+01 | 2.18E+13 | 6.89E+01 | 2.14E+13 | 2.15E+01 | 6.68E+12 | 2.95E+01 | 9.18E+12 | 2.95E+01 | 9.18E+12 |
| Labor                           | J           | 0.60 | 5.73E+06 | 3.50E+06 | 2.01E+13 | 3.54E+06 | 2.03E+13 | 3.50E+06 | 2.01E+13 | 3.54E+06 | 2.03E+13 | 3.54E+06 | 2.03E+13 |
| Outputs                         | body weight | kg   |          | 110.1206 |          | 121.9301 |          | 112.142  |          | 103.9724 |          | 104.6843 |          |
| Total emergy                    |             |      |          |          | 6.47E+14 |          | 6.83E+14 |          | 5.88E+14 |          | 5.27E+14 |          | 5.17E+14 |
| Raising period                  |             |      | 180 days |          |          |          |          |          |          |          |          |          |          |
| Natural environmental inputs    |             |      |          |          |          |          |          |          |          |          |          |          |          |
| sun c                           | J           | 1.00 | 1.00E+00 | 9.74E+09 | 9.74E+09 | 7.79E+09 | 7.79E+09 | 9.74E+09 | 9.74E+09 | 7.78E+09 | 7.78E+09 | 7.78E+09 | 7.78E+09 |
| wind c                          | J           | 1.00 | 1.86E+03 | 2.70E+06 | 5.01E+09 | 2.14E+06 | 3.98E+09 | 2.68E+06 | 4.98E+09 | 2.16E+06 | 4.01E+09 | 2.14E+06 | 3.98E+09 |
| Rain c                          | J           | 1.00 | 2.35E+04 | 5.45E+06 | 1.28E+11 | 4.36E+06 | 1.02E+11 | 5.45E+06 | 1.28E+11 | 4.36E+06 | 1.02E+11 | 4.36E+06 | 1.02E+11 |
| Ground water                    | J           | 0.00 | 1.86E+05 | 4.81E+06 | 8.92E+11 | 5.74E+06 | 1.07E+12 | 4.79E+06 | 8.89E+11 | 5.76E+06 | 1.07E+12 | 5.74E+06 | 1.07E+12 |
| Local materials                 |             |      |          |          |          |          |          |          |          |          |          |          |          |
| Silage maize(dry weight)        | kg          | 0.24 | 1.65E+11 | 0.00E+00 | 0.00E+00 | 6.68E+01 | 1.10E+13 | 2.15E+02 | 3.55E+13 | 2.20E+02 | 3.63E+13 | 3.30E+02 | 5.44E+13 |
| Maize                           | kg          | 0.24 | 5.87E+11 | 3.40E+02 | 2.00E+14 | 4.68E+02 | 2.75E+14 | 1.88E+02 | 1.10E+14 | 7.33E+01 | 4.31E+13 | 0.00E+00 | 0.00E+00 |
| Soybean meal                    | kg          | 0.33 | 1.42E+12 | 6.81E+01 | 9.69E+13 | 1.00E+02 | 1.43E+14 | 8.06E+01 | 1.15E+14 | 5.50E+01 | 7.83E+13 | 6.18E+01 | 8.80E+13 |
| Wheat bran                      | kg          | 0.41 | 8.32E+11 | 4.54E+01 | 3.78E+13 | 3.34E+01 | 2.78E+13 | 5.38E+01 | 4.47E+13 | 1.83E+01 | 1.53E+13 | 2.06E+01 | 1.71E+13 |
| Purchased materials or services |             |      |          |          |          |          |          |          |          |          |          |          |          |
| Piglet                          | Kg          | 0.21 | 9.02E+12 | 4.00E+01 | 3.61E+14 |
| Disinfectants                   | g           | 0.00 | 1.27E+09 | 2.78E+01 | 3.54E+10 |
| Vaccine                         | g           | 0.00 | 1.89E+10 | 3.15E+00 | 5.94E+10 | 2.95E+00 | 5.57E+10 | 1.07E+00 | 2.02E+10 | 2.95E+00 | 5.57E+10 | 2.95E+00 | 5.57E+10 |
| Micro-biological additives      | ¥           | 0.20 | 3.11E+11 | 3.74E+01 | 1.16E+13 |
| Electricity                     | J           | 0.09 | 2.17E+05 | 4.16E+06 | 9.04E+11 |
| Steel                           | g           | 0.00 | 3.52E+09 | 7.20E+02 | 2.54E+12 |

|                            |                                 |      |          |          |          |          |          |          |          |          |          |          |          |
|----------------------------|---------------------------------|------|----------|----------|----------|----------|----------|----------|----------|----------|----------|----------|----------|
| Concrete                   | g                               | 0.00 | 4.42E+08 | 5.13E+03 | 2.27E+12 |
| Glass                      | g                               | 0.00 | 2.90E+07 | 2.63E+01 | 7.63E+08 |
| Building                   | ¥                               | 0.05 | 3.11E+11 | 1.25E+00 | 3.89E+11 |
| Facilities                 | ¥                               | 0.05 | 3.11E+11 | 6.24E+00 | 1.94E+12 |
| Medicine                   | ¥                               | 0.05 | 3.11E+11 | 1.05E+02 | 3.26E+13 | 1.03E+02 | 3.21E+13 | 3.22E+01 | 1.00E+13 | 4.43E+01 | 1.38E+13 | 4.43E+01 | 1.38E+13 |
| Labor                      | J                               | 0.60 | 5.73E+06 | 5.26E+06 | 3.01E+13 | 5.31E+06 | 3.04E+13 | 5.26E+06 | 3.01E+13 | 5.31E+06 | 3.04E+13 | 5.31E+06 | 3.04E+13 |
| Outputs                    | body weight                     | kg   |          | 1.44E+02 |          | 1.84E+02 |          | 1.53E+02 |          | 1.29E+02 |          | 1.28E+02 |          |
| Total emergy               |                                 |      |          |          | 7.79E+14 |          | 9.00E+14 |          | 7.27E+14 |          | 5.99E+14 |          | 5.85E+14 |
|                            | Raising period                  |      |          | 240 days |          |          |          |          |          |          |          |          |          |
|                            | Natural environmental inputs    |      |          |          |          |          |          |          |          |          |          |          |          |
| sun c                      | J                               | 1.00 | 1.00E+00 | 1.30E+10 | 1.30E+10 | 1.04E+10 | 1.04E+10 | 1.30E+10 | 1.30E+10 | 1.04E+10 | 1.04E+10 | 1.04E+10 | 1.04E+10 |
| wind c                     | J                               | 1.00 | 1.86E+03 | 3.60E+06 | 6.68E+09 | 2.86E+06 | 5.30E+09 | 3.58E+06 | 6.64E+09 | 2.88E+06 | 5.35E+09 | 2.86E+06 | 5.30E+09 |
| Rain c                     | J                               | 1.00 | 2.35E+04 | 7.27E+06 | 1.71E+11 | 5.81E+06 | 1.36E+11 | 7.27E+06 | 1.71E+11 | 5.81E+06 | 1.36E+11 | 5.81E+06 | 1.36E+11 |
| Ground water               | J                               | 0.00 | 1.86E+05 | 6.41E+06 | 1.19E+12 | 7.66E+06 | 1.42E+12 | 6.38E+06 | 1.18E+12 | 7.68E+06 | 1.43E+12 | 7.66E+06 | 1.42E+12 |
|                            | Local materials                 |      |          |          |          |          |          |          |          |          |          |          |          |
| Silage maize(dry weight)   | kg                              | 0.24 | 1.65E+11 | 0        | 0.00E+00 | 94.30547 | 1.56E+13 | 284.4084 | 4.69E+13 | 259.0082 | 4.27E+13 | 385.6342 | 6.36E+13 |
| Maize                      | kg                              | 0.24 | 5.87E+11 | 411.1193 | 2.41E+14 | 660.1383 | 3.88E+14 | 248.8573 | 1.46E+14 | 86.33605 | 5.07E+13 | 0        | 0.00E+00 |
| Soybean meal               | kg                              | 0.33 | 1.42E+12 | 82.22386 | 1.17E+14 | 141.4582 | 2.01E+14 | 106.6531 | 1.52E+14 | 64.75204 | 9.22E+13 | 72.30642 | 1.03E+14 |
| Wheat bran                 | kg                              | 0.41 | 8.32E+11 | 54.81591 | 4.56E+13 | 47.15274 | 3.92E+13 | 71.1021  | 5.92E+13 | 21.58401 | 1.80E+13 | 24.10214 | 2.01E+13 |
|                            | Purchased materials or services |      |          |          |          |          |          |          |          |          |          |          |          |
| Piglet                     | Kg                              | 0.21 | 9.02E+12 | 4.00E+01 | 3.61E+14 |
| Disinfectants              | g                               | 0.00 | 1.27E+09 | 2.78E+01 | 3.54E+10 |
| Vaccine                    | g                               | 0.00 | 1.89E+10 | 4.20E+00 | 7.92E+10 | 3.94E+00 | 7.42E+10 | 1.43E+00 | 2.70E+10 | 3.94E+00 | 7.42E+10 | 3.94E+00 | 7.42E+10 |
| Micro-biological additives | ¥                               | 0.20 | 3.11E+11 | 4.99E+01 | 1.55E+13 |
| Electricity                | J                               | 0.09 | 2.17E+05 | 5.54E+06 | 1.21E+12 |

|                            |                                 |      |          |          |          |          |          |          |          |          |          |          |          |
|----------------------------|---------------------------------|------|----------|----------|----------|----------|----------|----------|----------|----------|----------|----------|----------|
| Steel                      | g                               | 0.00 | 3.52E+09 | 1.44E+03 | 5.07E+12 |
| Concrete                   | g                               | 0.00 | 4.42E+08 | 1.03E+04 | 4.53E+12 |
| Glass                      | g                               | 0.00 | 2.90E+07 | 5.26E+01 | 1.53E+09 |
| Building                   | ¥                               | 0.05 | 3.11E+11 | 2.50E+00 | 7.77E+11 |
| Facilities                 | ¥                               | 0.05 | 3.11E+11 | 1.25E+01 | 3.88E+12 |
| Medicine                   | ¥                               | 0.05 | 3.11E+11 | 1.40E+02 | 4.35E+13 | 1.38E+02 | 4.28E+13 | 4.30E+01 | 1.34E+13 | 5.90E+01 | 1.84E+13 | 5.90E+01 | 1.84E+13 |
| Labor                      | J                               | 0.60 | 5.73E+06 | 7.01E+06 | 4.01E+13 | 7.08E+06 | 4.05E+13 | 7.01E+06 | 4.01E+13 | 7.08E+06 | 4.05E+13 | 7.08E+06 | 4.05E+13 |
| Outputs                    | body weight                     | kg   |          | 1.66E+02 |          | 2.47E+02 |          | 1.84E+02 |          | 1.42E+02 |          | 1.40E+02 |          |
| Total emergy               |                                 |      |          |          | 8.81E+14 |          | 1.12E+15 |          | 8.51E+14 |          | 6.56E+14 |          | 6.39E+14 |
|                            | Raising period                  |      |          | 300 days |          |          |          |          |          |          |          |          |          |
|                            | Natural environmental inputs    |      |          |          |          |          |          |          |          |          |          |          |          |
| sun c                      | J                               | 1.00 | 1.00E+00 | 1.62E+10 | 1.62E+10 | 1.30E+10 | 1.30E+10 | 1.62E+10 | 1.62E+10 | 1.30E+10 | 1.30E+10 | 1.30E+10 | 1.30E+10 |
| wind c                     | J                               | 1.00 | 1.86E+03 | 4.50E+06 | 8.35E+09 | 3.57E+06 | 6.63E+09 | 4.47E+06 | 8.30E+09 | 3.60E+06 | 6.68E+09 | 3.57E+06 | 6.63E+09 |
| Rain c                     | J                               | 1.00 | 2.35E+04 | 9.09E+06 | 2.13E+11 | 7.26E+06 | 1.71E+11 | 9.09E+06 | 2.13E+11 | 7.26E+06 | 1.71E+11 | 7.26E+06 | 1.71E+11 |
| Ground water               | J                               | 0.00 | 1.86E+05 | 8.01E+06 | 1.49E+12 | 9.57E+06 | 1.78E+12 | 7.98E+06 | 1.48E+12 | 9.60E+06 | 1.78E+12 | 9.57E+06 | 1.78E+12 |
|                            | Local materials                 |      |          |          |          |          |          |          |          |          |          |          |          |
| Silage maize(dry weight)   | kg                              | 0.24 | 1.65E+11 | 0.00E+00 | 0.00E+00 | 1.16E+02 | 1.91E+13 | 3.29E+02 | 5.43E+13 | 2.78E+02 | 4.59E+13 | 4.11E+02 | 6.79E+13 |
| Maize                      | kg                              | 0.24 | 5.87E+11 | 4.49E+02 | 2.64E+14 | 8.12E+02 | 4.76E+14 | 2.88E+02 | 1.69E+14 | 9.26E+01 | 5.44E+13 | 0.00E+00 | 0.00E+00 |
| Soybean meal               | kg                              | 0.33 | 1.42E+12 | 8.99E+01 | 1.28E+14 | 1.74E+02 | 2.48E+14 | 1.23E+02 | 1.76E+14 | 6.95E+01 | 9.89E+13 | 7.71E+01 | 1.10E+14 |
| Wheat bran                 | kg                              | 0.41 | 8.32E+11 | 5.99E+01 | 4.98E+13 | 5.80E+01 | 4.82E+13 | 8.23E+01 | 6.84E+13 | 2.32E+01 | 1.93E+13 | 2.57E+01 | 2.14E+13 |
|                            | Purchased materials or services |      |          |          |          |          |          |          |          |          |          |          |          |
| Piglet                     | Kg                              | 0.21 | 9.02E+12 | 4.00E+01 | 3.61E+14 |
| Disinfectants              | g                               | 0.00 | 1.27E+09 | 2.78E+01 | 3.54E+10 |
| Vaccine                    | g                               | 0.00 | 1.89E+10 | 5.25E+00 | 9.90E+10 | 4.92E+00 | 9.28E+10 | 1.79E+00 | 3.37E+10 | 4.92E+00 | 9.28E+10 | 4.92E+00 | 9.28E+10 |
| Micro-biological additives | ¥                               | 0.20 | 3.11E+11 | 6.24E+01 | 1.94E+13 |

|                          |                                 |      |          |          |          |          |          |          |          |          |          |          |          |
|--------------------------|---------------------------------|------|----------|----------|----------|----------|----------|----------|----------|----------|----------|----------|----------|
| Electricity              | J                               | 0.09 | 2.17E+05 | 6.93E+06 | 1.51E+12 |
| Steel                    | g                               | 0.00 | 3.52E+09 | 1.44E+03 | 5.07E+12 |
| Concrete                 | g                               | 0.00 | 4.42E+08 | 1.03E+04 | 4.53E+12 |
| Glass                    | g                               | 0.00 | 2.90E+07 | 5.26E+01 | 1.53E+09 |
| Building                 | ¥                               | 0.05 | 3.11E+11 | 2.50E+00 | 7.77E+11 |
| Facilities               | ¥                               | 0.05 | 3.11E+11 | 1.25E+01 | 3.88E+12 |
| Medicine                 | ¥                               | 0.05 | 3.11E+11 | 1.75E+02 | 5.44E+13 | 1.72E+02 | 5.36E+13 | 5.37E+01 | 1.67E+13 | 7.38E+01 | 2.30E+13 | 7.38E+01 | 2.30E+13 |
| Labor                    | J                               | 0.60 | 5.73E+06 | 8.76E+06 | 5.02E+13 | 8.85E+06 | 5.07E+13 | 8.76E+06 | 5.02E+13 | 8.85E+06 | 5.07E+13 | 8.85E+06 | 5.07E+13 |
| Outputs                  | body weight                     | kg   |          | 1.78E+02 |          | 2.97E+02 |          | 2.04E+02 |          | 1.49E+02 |          | 1.45E+02 |          |
| Total emergy             |                                 |      |          |          | 9.44E+14 |          | 1.29E+15 |          | 9.32E+14 |          | 6.90E+14 |          | 6.71E+14 |
|                          | Raising period                  |      |          | 360 days |          |          |          |          |          |          |          |          |          |
|                          | Natural environmental inputs    |      |          |          |          |          |          |          |          |          |          |          |          |
| sun c                    | J                               | 1.00 | 1.00E+00 | 1.95E+10 | 1.95E+10 | 1.56E+10 | 1.56E+10 | 1.95E+10 | 1.95E+10 | 1.56E+10 | 1.56E+10 | 1.56E+10 | 1.56E+10 |
| wind c                   | J                               | 1.00 | 1.86E+03 | 5.40E+06 | 1.00E+10 | 4.28E+06 | 7.95E+09 | 5.36E+06 | 9.96E+09 | 4.32E+06 | 8.02E+09 | 4.28E+06 | 7.95E+09 |
| Rain c                   | J                               | 1.00 | 2.35E+04 | 1.09E+07 | 2.56E+11 | 8.71E+06 | 2.05E+11 | 1.09E+07 | 2.56E+11 | 8.71E+06 | 2.05E+11 | 8.71E+06 | 2.05E+11 |
| Ground water             | J                               | 0.00 | 1.86E+05 | 9.61E+06 | 1.78E+12 | 1.15E+07 | 2.13E+12 | 9.58E+06 | 1.78E+12 | 1.15E+07 | 2.14E+12 | 1.15E+07 | 2.13E+12 |
|                          | Local materials                 |      |          |          |          |          |          |          |          |          |          |          |          |
| Silage maize(dry weight) | kg                              | 0.24 | 1.65E+11 | 0        | 0.00E+00 | 130.1504 | 2.15E+13 | 353.6409 | 5.84E+13 | 286.2076 | 4.72E+13 | 422.1369 | 6.97E+13 |
| Maize                    | kg                              | 0.24 | 5.87E+11 | 467.8725 | 2.75E+14 | 911.0528 | 5.35E+14 | 309.4358 | 1.82E+14 | 95.40252 | 5.60E+13 | 0        | 0.00E+00 |
| Soybean meal             | kg                              | 0.33 | 1.42E+12 | 93.57449 | 1.33E+14 | 195.2256 | 2.78E+14 | 132.6153 | 1.89E+14 | 71.55189 | 1.02E+14 | 79.15068 | 1.13E+14 |
| Wheat bran               | kg                              | 0.41 | 8.32E+11 | 62.38299 | 5.19E+13 | 65.0752  | 5.41E+13 | 88.41022 | 7.36E+13 | 23.85063 | 1.98E+13 | 26.38356 | 2.20E+13 |
|                          | Purchased materials or services |      |          |          |          |          |          |          |          |          |          |          |          |
| Piglet                   | Kg                              | 0.21 | 9.02E+12 | 4.00E+01 | 3.61E+14 |
| Disinfectants            | g                               | 0.00 | 1.27E+09 | 2.78E+01 | 3.54E+10 |
| Vaccine                  | g                               | 0.00 | 1.89E+10 | 6.30E+00 | 1.19E+11 | 5.90E+00 | 1.11E+11 | 2.15E+00 | 4.05E+10 | 5.90E+00 | 1.11E+11 | 5.90E+00 | 1.11E+11 |

|                            |             |      |          |          |          |          |          |          |          |          |          |          |          |
|----------------------------|-------------|------|----------|----------|----------|----------|----------|----------|----------|----------|----------|----------|----------|
| Micro-biological additives | ¥           | 0.20 | 3.11E+11 | 7.49E+01 | 2.33E+13 |
| Electricity                | J           | 0.09 | 2.17E+05 | 8.32E+06 | 1.81E+12 |
| Steel                      | g           | 0.00 | 3.52E+09 | 1.44E+03 | 5.07E+12 |
| Concrete                   | g           | 0.00 | 4.42E+08 | 1.03E+04 | 4.53E+12 |
| Glass                      | g           | 0.00 | 2.90E+07 | 5.26E+01 | 1.53E+09 |
| Building                   | ¥           | 0.05 | 3.11E+11 | 2.50E+00 | 7.77E+11 |
| Facilities                 | ¥           | 0.05 | 3.11E+11 | 1.25E+01 | 3.88E+12 |
| Medicine                   | ¥           | 0.05 | 3.11E+11 | 2.10E+02 | 6.53E+13 | 2.07E+02 | 6.43E+13 | 6.44E+01 | 2.00E+13 | 8.86E+01 | 2.75E+13 | 8.86E+01 | 2.75E+13 |
| Labor                      | J           | 0.60 | 5.73E+06 | 1.05E+07 | 6.02E+13 | 1.06E+07 | 6.08E+13 | 1.05E+07 | 6.02E+13 | 1.06E+07 | 6.08E+13 | 1.06E+07 | 6.08E+13 |
| Outputs                    | body weight | kg   |          | 1.84E+02 |          | 3.30E+02 |          | 2.14E+02 |          | 1.52E+02 |          | 1.47E+02 |          |
| Total emergy               |             |      |          |          | 9.87E+14 |          | 1.42E+15 |          | 9.85E+14 |          | 7.16E+14 |          | 6.95E+14 |

<sup>a</sup>:The baseline used in this study is12.00E+24seJ/year standard.

<sup>b</sup>: Only the highest value of wind and rain was considered.

<sup>c</sup>: Compound fertiliser was calculated by its composition of N,P,K.

## Supplementary material B

**Table S2. Cost details of ecological livestock production systems (per pig)**

| Group   | Items        | Units | Raising Period (days) |        |        |        |        |        |
|---------|--------------|-------|-----------------------|--------|--------|--------|--------|--------|
|         |              |       | 60.00                 | 120.00 | 180.00 | 240.00 | 300.00 | 360.00 |
| Group A | Piglet       | ¥/kg  | 800.00                | 800.00 | 800.00 | 800.00 | 800.00 | 800.00 |
|         | Silage maize | ¥/kg  | 0.00                  | 0.00   | 0.00   | 0.00   | 0.00   | 0.00   |
|         | Maize        | ¥/kg  | 79.52                 | 173.12 | 253.90 | 306.73 | 335.26 | 349.07 |
|         | Soybean meal | ¥/kg  | 4.04                  | 8.80   | 12.91  | 15.59  | 17.04  | 17.75  |

|         |                            |           |        |        |        |        |        |        |
|---------|----------------------------|-----------|--------|--------|--------|--------|--------|--------|
|         | Wheat bran                 | ¥/kg      | 45.47  | 99.00  | 145.20 | 175.41 | 191.72 | 199.63 |
|         | Vaccine                    | ¥/g       | 3.09   | 3.09   | 3.09   | 3.09   | 3.09   | 3.09   |
|         | Disinfectants              | ¥/g       | 1.58   | 3.15   | 4.73   | 6.30   | 7.88   | 9.45   |
|         | Micro-biological additives | ¥.per pig | 12.48  | 24.96  | 37.44  | 49.92  | 62.40  | 74.88  |
|         | Electricity                | ¥.J       | 0.21   | 0.42   | 0.63   | 0.84   | 1.05   | 1.26   |
|         | Steel                      | ¥/g       | 3.74   | 3.74   | 3.74   | 7.49   | 7.49   | 7.49   |
|         | Concrete                   | ¥/g       | 0.95   | 0.95   | 0.95   | 1.90   | 1.90   | 1.90   |
|         | Glass                      | ¥/g       | 0.06   | 0.06   | 0.06   | 0.11   | 0.11   | 0.11   |
|         | Building                   | ¥.per pig | 1.25   | 1.25   | 1.25   | 2.50   | 2.50   | 2.50   |
|         | Facilities                 | ¥.per pig | 6.24   | 6.24   | 6.24   | 12.48  | 12.48  | 12.48  |
|         | Medicine                   | ¥.per pig | 34.98  | 69.96  | 104.94 | 139.92 | 174.90 | 209.88 |
|         | Labor                      | ¥.J       | 5.55   | 11.11  | 16.66  | 22.22  | 27.77  | 33.32  |
| Group B | Piglet                     | ¥/kg      | 800.00 | 800.00 | 800.00 | 800.00 | 800.00 | 800.00 |
|         | Silage maize               | ¥/g       | 1.89   | 4.63   | 7.98   | 11.27  | 13.85  | 15.55  |
|         | Maize                      | ¥/g       | 82.48  | 202.56 | 349.00 | 492.52 | 605.46 | 679.73 |
|         | Soybean meal               | ¥/g       | 4.49   | 11.03  | 19.01  | 26.83  | 32.98  | 37.03  |
|         | Wheat bran                 | ¥/g       | 25.27  | 62.06  | 106.92 | 150.89 | 185.49 | 208.24 |
|         | Vaccine                    | ¥/g       | 3.09   | 3.09   | 3.09   | 3.09   | 3.09   | 3.09   |
|         | Disinfectants              | ¥/g       | 1.48   | 2.95   | 4.43   | 5.90   | 7.38   | 8.86   |
|         | Micro-biological additives | ¥.per pig | 12.48  | 24.96  | 37.44  | 49.92  | 62.40  | 74.88  |
|         | Electricity                | ¥.J       | 0.21   | 0.42   | 0.63   | 0.84   | 1.05   | 1.26   |
|         | Steel                      | ¥/g       | 3.74   | 3.74   | 3.74   | 7.49   | 7.49   | 7.49   |
|         | Concrete                   | ¥/g       | 0.95   | 0.95   | 0.95   | 1.90   | 1.90   | 1.90   |



|         |                            |           |        |        |        |        |        |        |
|---------|----------------------------|-----------|--------|--------|--------|--------|--------|--------|
|         | Glass                      | ¥/g       | 0.06   | 0.06   | 0.06   | 0.11   | 0.11   | 0.11   |
|         | Building                   | ¥.per pig | 1.25   | 1.25   | 1.25   | 2.50   | 2.50   | 2.50   |
|         | Facilities                 | ¥.per pig | 6.24   | 6.24   | 6.24   | 12.48  | 12.48  | 12.48  |
|         | Medicine                   | ¥.per pig | 34.44  | 68.88  | 103.32 | 137.76 | 172.20 | 206.64 |
|         | Labor                      | ¥.J       | 5.61   | 11.22  | 16.83  | 22.44  | 28.05  | 33.67  |
| Group C | Piglet                     | ¥/kg      | 800.00 | 800.00 | 800.00 | 800.00 | 800.00 | 800.00 |
|         | Silage maize               | ¥/g       | 6.26   | 15.52  | 25.69  | 33.98  | 39.31  | 42.25  |
|         | Maize                      | ¥/g       | 34.18  | 84.81  | 140.40 | 185.67 | 214.79 | 230.87 |
|         | Soybean meal               | ¥/g       | 3.72   | 9.24   | 15.30  | 20.23  | 23.40  | 25.15  |
|         | Wheat bran                 | ¥/g       | 41.89  | 103.93 | 172.05 | 227.53 | 263.21 | 282.91 |
|         | Vaccine                    | ¥/g       | 3.09   | 3.09   | 3.09   | 3.09   | 3.09   | 3.09   |
|         | Disinfectants              | ¥/g       | 0.54   | 1.07   | 1.61   | 2.15   | 2.68   | 3.22   |
|         | Micro-biological additives | ¥.per pig | 12.48  | 24.96  | 37.44  | 49.92  | 62.40  | 74.88  |
|         | Electricity                | ¥.J       | 0.21   | 0.42   | 0.63   | 0.84   | 1.05   | 1.26   |
|         | Steel                      | ¥/g       | 3.74   | 3.74   | 3.74   | 7.49   | 7.49   | 7.49   |
|         | Concrete                   | ¥/g       | 0.95   | 0.95   | 0.95   | 1.90   | 1.90   | 1.90   |
|         | Glass                      | ¥/g       | 0.06   | 0.06   | 0.06   | 0.11   | 0.11   | 0.11   |
|         | Building                   | ¥.per pig | 1.25   | 1.25   | 1.25   | 2.50   | 2.50   | 2.50   |
|         | Facilities                 | ¥.per pig | 6.24   | 6.24   | 6.24   | 12.48  | 12.48  | 12.48  |
|         | Medicine                   | ¥.per pig | 10.74  | 21.48  | 32.22  | 42.96  | 53.70  | 64.44  |
|         | Labor                      | ¥.J       | 5.55   | 11.11  | 16.66  | 22.22  | 27.77  | 33.32  |
| Group D | Piglet                     | ¥/kg      | 800.00 | 800.00 | 800.00 | 800.00 | 800.00 | 800.00 |
|         | Silage maize               | ¥/g       | 8.34   | 18.31  | 26.29  | 30.94  | 33.20  | 34.19  |
|         | Maize                      | ¥/g       | 17.35  | 38.12  | 54.72  | 64.41  | 69.11  | 71.18  |

|         |                            |           |        |        |        |        |        |        |
|---------|----------------------------|-----------|--------|--------|--------|--------|--------|--------|
|         | Soybean meal               | ¥/g       | 3.31   | 7.27   | 10.43  | 12.28  | 13.18  | 13.57  |
|         | Wheat bran                 | ¥/g       | 18.60  | 40.88  | 58.68  | 69.07  | 74.10  | 76.32  |
|         | Vaccine                    | ¥/g       | 3.09   | 3.09   | 3.09   | 3.09   | 3.09   | 3.09   |
|         | Disinfectants              | ¥/g       | 1.48   | 2.95   | 4.43   | 5.90   | 7.38   | 8.86   |
|         | Micro-biological additives | ¥.per pig | 12.48  | 24.96  | 37.44  | 49.92  | 62.40  | 74.88  |
|         | Electricity                | ¥.J       | 0.21   | 0.42   | 0.63   | 0.84   | 1.05   | 1.26   |
|         | Steel                      | ¥/g       | 3.74   | 3.74   | 3.74   | 7.49   | 7.49   | 7.49   |
|         | Concrete                   | ¥/g       | 0.95   | 0.95   | 0.95   | 1.90   | 1.90   | 1.90   |
|         | Glass                      | ¥/g       | 0.06   | 0.06   | 0.06   | 0.11   | 0.11   | 0.11   |
|         | Building                   | ¥.per pig | 1.25   | 1.25   | 1.25   | 2.50   | 2.50   | 2.50   |
|         | Facilities                 | ¥.per pig | 6.24   | 6.24   | 6.24   | 12.48  | 12.48  | 12.48  |
|         | Medicine                   | ¥.per pig | 14.76  | 29.52  | 44.28  | 59.04  | 73.80  | 88.56  |
|         | Labor                      | ¥.J       | 5.61   | 11.22  | 16.83  | 22.44  | 28.05  | 33.67  |
| Group E | Piglet                     | ¥/kg      | 800.00 | 800.00 | 800.00 | 800.00 | 800.00 | 800.00 |
|         | Silage maize               | ¥/g       | 12.10  | 27.36  | 39.38  | 46.07  | 49.15  | 50.43  |
|         | Maize                      | ¥/g       | 0.00   | 0.00   | 0.00   | 0.00   | 0.00   | 0.00   |
|         | Soybean meal               | ¥/g       | 3.60   | 8.14   | 11.72  | 13.71  | 14.63  | 15.01  |
|         | Wheat bran                 | ¥/g       | 20.25  | 45.79  | 65.91  | 77.13  | 82.27  | 84.43  |
|         | Vaccine                    | ¥/g       | 3.09   | 3.09   | 3.09   | 3.09   | 3.09   | 3.09   |
|         | Disinfectants              | ¥/g       | 1.48   | 2.95   | 4.43   | 5.90   | 7.38   | 8.86   |
|         | Micro-biological additives | ¥.per pig | 12.48  | 24.96  | 37.44  | 49.92  | 62.40  | 74.88  |
|         | Electricity                | ¥.J       | 0.21   | 0.42   | 0.63   | 0.84   | 1.05   | 1.26   |
|         | Steel                      | ¥/g       | 3.74   | 3.74   | 3.74   | 7.49   | 7.49   | 7.49   |

|  |            |           |       |       |       |       |       |       |
|--|------------|-----------|-------|-------|-------|-------|-------|-------|
|  | Concrete   | ¥/g       | 0.95  | 0.95  | 0.95  | 1.90  | 1.90  | 1.90  |
|  | Glass      | ¥/g       | 0.06  | 0.06  | 0.06  | 0.11  | 0.11  | 0.11  |
|  | Building   | ¥.per pig | 1.25  | 1.25  | 1.25  | 2.50  | 2.50  | 2.50  |
|  | Facilities | ¥.per pig | 6.24  | 6.24  | 6.24  | 12.48 | 12.48 | 12.48 |
|  | Medicine   | ¥.per pig | 14.76 | 29.52 | 44.28 | 59.04 | 73.80 | 88.56 |
|  | Labor      | ¥.J       | 5.61  | 11.22 | 16.83 | 22.44 | 28.05 | 33.67 |

**Table S3. Economic indices of ecological livestock production systems (per pig)**

| Group | Items                           | Units | Raising period (days) |        |        |        |        |        |
|-------|---------------------------------|-------|-----------------------|--------|--------|--------|--------|--------|
|       |                                 |       | 60                    | 120    | 180    | 240    | 300    | 360    |
| A     | Price                           | ¥     | 30.0                  | 30.0   | 30.0   | 30.0   | 30.0   | 30.0   |
|       | Cost                            | ¥     | 2153.4                | 3303.6 | 4313.3 | 4980.3 | 5342.4 | 5518.2 |
|       | Profits                         | ¥     | 1154.2                | 2097.8 | 2921.6 | 3435.8 | 3696.8 | 3795.4 |
|       | Profits per kg live body weight | ¥/kg  | 16.1                  | 19.0   | 20.3   | 20.7   | 20.8   | 20.6   |
| B     | Price                           | ¥     | 30.0                  | 30.0   | 30.0   | 30.0   | 30.0   | 30.0   |
|       | Cost                            | ¥     | 2177.6                | 3657.9 | 5523.2 | 7397.1 | 8896.6 | 9892.8 |
|       | Profits                         | ¥     | 1193.9                | 2453.9 | 4062.3 | 5671.1 | 6960.1 | 7799.4 |
|       | Profits per kg live body weight | ¥/kg  | 16.4                  | 20.1   | 22.1   | 23.0   | 23.5   | 23.7   |
| C     | Price                           | ¥     | 30.0                  | 30.0   | 30.0   | 30.0   | 30.0   | 30.0   |
|       | Cost                            | ¥     | 2138.2                | 3364.3 | 4591.7 | 5532.8 | 6117.2 | 6434.0 |
|       | Profits                         | ¥     | 1207.3                | 2276.4 | 3334.4 | 4119.7 | 4601.3 | 4848.2 |
|       | Profits per kg live body weight | ¥/kg  | 16.9                  | 20.3   | 21.8   | 22.3   | 22.6   | 22.6   |
| D     | Price                           | ¥     | 30.0                  | 30.0   | 30.0   | 30.0   | 30.0   | 30.0   |
|       | Cost                            | ¥     | 2128.5                | 3119.2 | 3855.9 | 4269.8 | 4466.7 | 4552.8 |
|       | Profits                         | ¥     | 1231.0                | 2130.2 | 2786.8 | 3127.4 | 3276.8 | 3322.8 |

|   |                                 |      |        |        |        |        |        |        |
|---|---------------------------------|------|--------|--------|--------|--------|--------|--------|
|   | Profits per kg live body weight | ¥/kg | 17.4   | 20.5   | 21.7   | 22.0   | 22.0   | 21.9   |
| E | Price                           | ¥    | 30.0   | 30.0   | 30.0   | 30.0   | 30.0   | 30.0   |
|   | Cost                            | ¥    | 2155.8 | 3140.5 | 3827.5 | 4187.4 | 4348.0 | 4414.5 |
|   | Profits                         | ¥    | 1269.9 | 2174.8 | 2791.5 | 3084.7 | 3201.7 | 3229.9 |
|   | Profits per kg live body weight | ¥/kg | 17.7   | 20.8   | 21.9   | 22.1   | 22.1   | 21.9   |
